# Supplementary material for: Enzymes from Fungal and Plant Origin Required for Chemical Diversification of Insecticidal Loline Alkaloids in Grass-Epichloë Symbiota
Source: PubMed Central journal article supplement (PMC4274035; doi:10.1371/journal.pone.0115590), 2014-12-22
Supplement: pone.0115590.s001.pdf [file pone.0115590.s001.pdf]

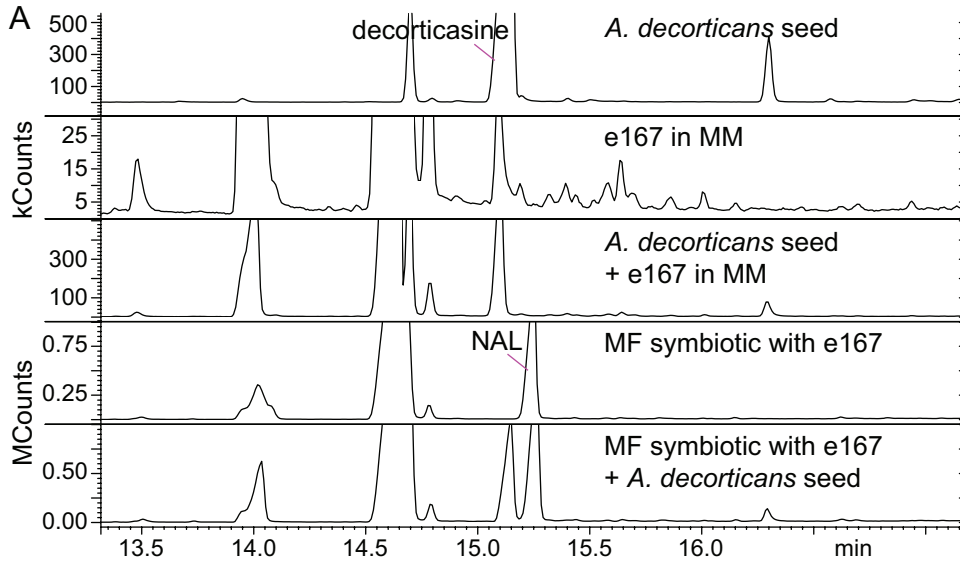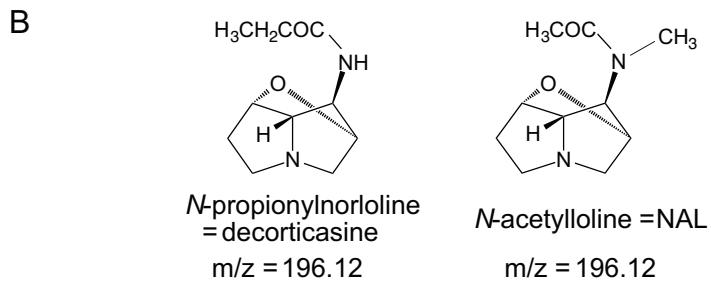

**Figure S1. Chromatograms of *N*-propionylnorlooline (decorticasine) and *N*-acetyllooline (NAL) in loline-alkaloid-producing systems.** (A) Comparison of loline alkaloids from *Adenocarpus decorticans* seed, *Epichloë uncinata* e167 in inducing culture, and meadow fescue symbiotic with e167. Only decorticasine and NAL peaks are labeled. (B) Structures of decorticasine and NAL.
